# Supplementary material for: Combined impact of pesticides and other environmental stressors on animal diversity in irrigation ponds
Source: PubMed Central journal article supplement (PMC7332035; doi:10.1371/journal.pone.0229052), 2020-07-02
Supplement: pone.0229052.s003.pdf [file pone.0229052.s003.pdf]

1 Hiroshi C. Ito, Hiroaki Shiraishi, Megumi Nakagawa, and Noriko Takamura. Combined impact  
2 of pesticides and other environmental stressors on animal diversity in irrigation ponds.

3

#### 4 **S2 Appendix: Statistical analysis**

##### 5 *S2.1 Principal components for the large contraction group*

6 In our statistical analysis, the large contraction group, denoted here by “Cont”, was represented  
7 by its four principal components, denoted by “Cont.var1”, “Cont.var2”, “Cont.var3”, and  
8 “Cont.var4”, as grouped variables. For each grouped variable, we list here the 10 uncontracted  
9 environmental variables with the highest absolute correlations with it (“I.”, “H.”, and “F.” mean  
10 insecticide, herbicide, and fungicide, respectively).

11 Cont.var1: I.thiamethoxam (−0.86), H.bromobutide (−0.83), H.bentazone (−0.83), TP (−0.81),  
12 F.pyroquilon (−0.77), H.oxaziclomefon (−0.75), F.tiadinil (−0.72), F.furametpyr (−0.69),  
13 H.chlomeprop (−0.68), TN (−0.67);

14 Cont.var2: E-plant noncoverage (0.80), I.malathion (−0.77), I.tebufenozide (−0.75), I.buprofezin  
15 (−0.64), SS (−0.61), H.pentoxazone (0.55), H.butachlor (0.51), F.isoprothiolane (0.50),  
16 I.imidacloprid (0.48), F.pyroquilon (−0.48);

17 Cont.var3: H.butachlor (−0.70), F.fthalide (−0.61), black bass (−0.59), F.ferimzone (−0.59), WT  
18 (0.58), F.isoprothiolane (−0.50), I.tebufenozide (−0.49), H.pentoxazone (−0.49), I.clothanidin (−  
19 0.47), I.malathion (−0.47);

20 Cont.var4: Chl-a (0.69), pH (0.68), H.oxaziclomefon (−0.43), H.chlomeprop (−0.42),  
21 F.azoxystrobin (−0.41), SS (0.40), TN (0.39), H.pyriminobac\_methyl\_E (0.39), F.furametpyr  
22 (0.37), H.mefenacet (0.37).

23

##### 24 *S2.2 Model selection*

25 We used the 14 contracted environmental variables as the explanatory variables to explain the  
26 response variable, taxonomic richness of a focal animal category. For convenience, all  
27 explanatory variables were rescaled to range from 0 to 1 (their mean and standard deviation

28 could deviate from 0 and 1 after this operation). For each of the possible subsets of the 14  
 29 explanatory variables, we constructed a Poisson regression mixed model (Broström and  
 30 Holmberg 2011), where any model has at least one explanatory variable. In each model, the  
 31 response variables were described by a vector  $\mathbf{y} = (y_1, \dots, y_M)$  of length  $M = 21$  (the number  
 32 of studied ponds), where  $y_i$  is its value for the  $i$ th pond. Explanatory variables were described  
 33 by a set of vectors  $\mathbf{x}_1, \dots, \mathbf{x}_K$  with  $1 \leq K \leq 14$ , each of which was denoted by  $\mathbf{x}_k =$   
 34  $(x_{k,1}, \dots, x_{k,M})$ . We assumed that  $y_i$  follows the Poisson distribution,

$$35 \quad y_i \sim \text{Poisson}(Y_i) \quad \text{Eq. (1) in the main text}$$

36 with its mean  $Y_i$  described as

$$37 \quad \ln(Y_i) = \alpha + \sum_{k=1}^K \beta_k x_{k,i} + r_i, \quad \text{Eq. (2) in the main text}$$

38 where  $\alpha$  is the intercept,  $x_{k,i}$  is the intensity of the  $k$ th explanatory variable at the  $i$ th pond  
 39 with its regression coefficient  $\beta_k$ , and  $r_i$  is a pond-specific random effect.  $r_i$  follows the  
 40 normal distribution with average 0 and standard deviation  $\sigma$ . For each of the models constructed  
 41 above, we calculated maximum likelihood estimations for  $\alpha, \beta_1, \dots, \beta_K$ , maximum marginal-  
 42 likelihood estimation for  $\sigma$  (Broström and Holmberg 2011), and the Akaike information  
 43 criterion (AIC) (Akaike 1973). To suppress the estimation bias of AIC as a distance measure  
 44 from an unknown true model, we excluded models that had more free parameters than one-third  
 45 of the sample size (Kitagawa et al. 1983); models with  $M/3 < K + 2$  (i.e.,  $\beta_1, \dots, \beta_K, \alpha$ , and  
 46  $\sigma$ ) were excluded. We also fitted the normal Poisson regression model by setting  $\sigma = 0$  in  
 47 advance, in which case models with  $M/3 < K + 1$  (i.e.,  $\beta_1, \dots, \beta_K, \alpha$ ) were excluded.

48 When the model with the lowest AIC, referred to as the contracted best model, had residuals  
 49 with significant spatial autocorrelation (i.e.,  $p$ -value  $< 0.05$  in either Moran's  $I$  test or Geary's  $C$   
 50 test), we excluded the model because the assumption of independence was violated, and we  
 51 treated the second best model as the contracted best model. This operation was repeated until  
 52 the spatial autocorrelation in the contracted best model's residuals became non-significant. (For  
 53 the results reported in this paper, none of the initial best models had residuals with significant

54 spatial autocorrelation.)

55

### 56 *S2.3 Statistical significance for statistically contributive stressors*

57 In this study, statistical significance for a statistically contributive stressor was evaluated by a  
58 permutation test that explicitly repeats the model selection, as explained below.

#### 59 *Test statistic and p-value*

60 We denote the observed values for the response and explanatory variables (contracted  
61 environmental variables) by  $\mathbf{y}$  and  $\mathbf{x}_1, \dots, \mathbf{x}_H$  with  $H = 14$ , respectively. We describe the best  
62 model for the observed data  $\mathbf{y}, \mathbf{x}_1, \dots, \mathbf{x}_H$  by  $\mathbf{m} = (m_1, \dots, m_H)$  with 0 or 1 for each entry,  
63 where  $m_h = 1$  means inclusion of the  $h$ th explanatory variable in the best model. We assume  
64 without loss of generality that the  $H$ th explanatory variable is to be tested, by its random  
65 resampling for  $J$  times. In the  $j$ th resampling of  $\mathbf{x}_H$  for  $j = 1, \dots, J$ , we denote the resampled  
66 values by  $\tilde{\mathbf{x}}_H^j$ , and denote the best model for  $\mathbf{y}, \mathbf{x}_1, \dots, \tilde{\mathbf{x}}_H^j$  by  $\tilde{\mathbf{m}}^j = (\tilde{m}_1^j, \dots, \tilde{m}_H^j)$ . We use a test  
67 statistic described as

$$68 \quad A(\tilde{\mathbf{x}}_H^j) = \begin{cases} \delta\text{AIC}(\tilde{\mathbf{x}}_H^j; \tilde{\mathbf{m}}^j) & \text{for condition (a) satisfied,} \\ -\infty & \text{for otherwise} \end{cases}, \quad (\text{S2.1})$$

69 with condition (a): conditions (i) and (iii) for the statistical contributiveness (defined in  
70 “Statistical inference” in the main text) are both satisfied, and the best model  $\tilde{\mathbf{m}}^j$  for  
71  $\mathbf{y}, \mathbf{x}_1, \dots, \tilde{\mathbf{x}}_H^j$  includes the  $H$ th explanatory variable ( $\tilde{m}_H^j = 1$ ) with a negative regression  
72 coefficient.

73 Here,  $\delta\text{AIC}(\tilde{\mathbf{x}}_H^j; \tilde{\mathbf{m}}^j)$  is the AIC difference caused by dropping the  $H$ th explanatory  
74 variable from  $\tilde{\mathbf{m}}^j$ , given by

$$75 \quad \delta\text{AIC}(\tilde{\mathbf{x}}_H^j; \tilde{\mathbf{m}}^j) = \text{AIC}(\mathbf{y}, \mathbf{x}_1, \dots, \mathbf{x}_{H-1}, \tilde{\mathbf{x}}_H^j; \tilde{\mathbf{m}}^{j,H-}) - \text{AIC}(\mathbf{y}, \mathbf{x}_1, \dots, \mathbf{x}_{H-1}, \tilde{\mathbf{x}}_H^j; \tilde{\mathbf{m}}^j), \quad (\text{S2.2})$$

76 with  $\tilde{\mathbf{m}}^{j,H-} = (\tilde{m}_1^j, \dots, \tilde{m}_{H-1}^j, 0)$ .

77 Since the  $H$ th explanatory variable is a statistically contributive stressor, satisfying  
78 condition (a) for  $\mathbf{y}, \mathbf{x}_1, \dots, \mathbf{x}_H$ , and  $\mathbf{m}$ , we see

79 
$$\begin{aligned} A(\mathbf{x}_H) &= \delta\text{AIC}(\mathbf{x}_H; \mathbf{m}) \\ &= \text{AIC}(\mathbf{y}, \mathbf{x}_1, \dots, \mathbf{x}_{H-1}, \mathbf{x}_H; \mathbf{m}^{H-}) - \text{AIC}(\mathbf{y}, \mathbf{x}_1, \dots, \mathbf{x}_{H-1}, \mathbf{x}_H; \mathbf{m}) \end{aligned} \quad (\text{S2.3})$$

80 with  $\mathbf{m}^{H-} = (m_1, \dots, m_{H-1}, 0)$ . Then by counting  $A(\tilde{\mathbf{x}}_H^j)$  that are no less than  $A(\mathbf{x}_H)$ , we  
81 calculate a  $p$ -value as

82 
$$p(A(\mathbf{x}_H)) = \frac{1}{J} \sum_{j=1}^J \text{count}^+ \left( A(\tilde{\mathbf{x}}_H^j) - A(\mathbf{x}_H) \right), \quad (\text{S2.4})$$

83 with

84 
$$\text{count}^+(t) = \begin{cases} 1 & \text{for } t > 0 \\ 0.5 & \text{for } t = 0 \\ 0 & \text{for } t < 0 \end{cases}. \quad (\text{S2.5})$$

85 Note that this permutation test corresponds to a one-sided test because condition (a) requires  
86 a negative regression coefficient for the focal explanatory variable. Allowing both signs gives a  
87 two-sided test.

88 To see the connection with normal permutation tests for regression coefficients in a given  
89 model, we assume that  $\tilde{\mathbf{m}}^j$  is always equal to  $\mathbf{m}$  for all  $j = 1, \dots, J$ , and we neglect condition  
90 (a). Then we can transform  $A(\tilde{\mathbf{x}}_H^j)$  as

91 
$$\begin{aligned} A(\tilde{\mathbf{x}}_H^j) &= \delta\text{AIC}(\tilde{\mathbf{x}}_H^j; \mathbf{m}) \\ &= \text{AIC}(\mathbf{y}, \mathbf{x}_1, \dots, \mathbf{x}_{H-1}, \tilde{\mathbf{x}}_H^j; \mathbf{m}^{H-}) - \text{AIC}(\mathbf{y}, \mathbf{x}_1, \dots, \mathbf{x}_{H-1}, \tilde{\mathbf{x}}_H^j; \mathbf{m}) \\ &= -2l\left(\mathbf{y}, \mathbf{x}_1, \dots, \mathbf{x}_{H-1}, \tilde{\mathbf{x}}_H^j; \mathbf{m}^{H-}\right) + 2l\left(\mathbf{y}, \mathbf{x}_1, \dots, \mathbf{x}_{H-1}, \tilde{\mathbf{x}}_H^j; \mathbf{m}\right) - 2, \end{aligned} \quad (\text{S2.6})$$

92 where  $l(\mathbf{y}, \mathbf{x}_1, \dots, \mathbf{x}_{H-1}, \tilde{\mathbf{x}}_H^j; \mathbf{m})$  is the maximum log-likelihood for model  $\mathbf{m}$  and dataset  
93  $\mathbf{y}, \mathbf{x}_1, \dots, \mathbf{x}_{H-1}, \tilde{\mathbf{x}}_H^j$ . We see  $A(\mathbf{x}_H) = -2l(\mathbf{y}, \mathbf{x}_1, \dots, \mathbf{x}_{H-1}, \tilde{\mathbf{x}}_H^j; \mathbf{m}^{H-}) +$   
94  $2l(\mathbf{y}, \mathbf{x}_1, \dots, \mathbf{x}_{H-1}, \mathbf{x}_H; \mathbf{m}) - 2$ . Thus, in this case,  $p(A(\mathbf{x}_H))$  gives a  $p$ -value by a permutation  
95 test using the log-likelihood ratio for the test statistic in a given model  $\mathbf{m}$ , without taking into  
96 account the model selection process.

### 97 *Resampling rule*

98 In our permutation test, following the philosophy of the permutation-of-regressor-residuals test  
99 (Werft and Benner 2010), we keep the expected correlation structure among all explanatory

100 variables constant in the contracted best model  $\mathbf{m} = (m_1, \dots, m_H)$ . We express  $\mathbf{x}_H$  as a linear  
 101 function of the remaining explanatory variables and residuals  $\boldsymbol{\varepsilon}_H$ ,

$$102 \quad \mathbf{x}_H = m_0\eta_0 + m_1\eta_1\mathbf{x}_1 + \dots + m_{H-1}\eta_{H-1}\mathbf{x}_{H-1} + \boldsymbol{\varepsilon}_H, \quad (\text{S2.7}),$$

103 where  $m_0 = 1$ . For  $h = 1, \dots, H$ , only  $\eta_h$  with  $m_h = 1$  are specified by the least squares  
 104 estimations ( $\mathbf{x}_h$  with  $m_h = 0$  are not used for the regression). Then random permutation of the  
 105 residuals  $\boldsymbol{\varepsilon}_H$  by  $J$  times gives

$$106 \quad \tilde{\mathbf{x}}_H^j = m_0\eta_0 + m_1\eta_1\mathbf{x}_1 + \dots + m_{H-1}\eta_{H-1}\mathbf{x}_{H-1} + \tilde{\boldsymbol{\varepsilon}}_H^j \quad (\text{S2.8})$$

107 for  $j = 1, \dots, J$ , with the  $j$ th permuted residual  $\tilde{\boldsymbol{\varepsilon}}_H^j$ .

108

#### 109 *S2.4 Discussion on conditions for statistical contributiveness*

110 In condition (i) for the statistical contributiveness (defined in ‘‘Statistical inference’’ in the main  
 111 text), the threshold  $C_{\Delta\text{AIC}} = 2.0$  is chosen because any model with  $\Delta\text{AIC} > 2.0$  is rejected by  
 112 the parametric likelihood ratio test for significance level 0.05, when that model is nested in the  
 113 contracted best model, as noted by Akaike (1974). This is because the  $p$ -value in such a case is  
 114 given by  $\Pr(\chi_k^2 > \Delta\text{AIC} + 2k)$  in the parametric log-likelihood test, where and  $\chi_k^2$  is a chi-  
 115 square random variable with  $k$  degrees of freedom, i.e., difference in the number of  
 116 explanatory variables between the contracted best model and a focal nested model (Murtaugh  
 117 2014).  $\Pr(\chi_k^2 > \Delta\text{AIC} + 2k) < 0.05$  holds good for any  $k \geq 1$  under  $\Delta\text{AIC} > 2.0$ . Although  
 118 this relationship does not hold for non-nested models, choosing 2.0 seems to be a good starting  
 119 point. Condition (ii) reinforces condition (i) by suppressing biases caused by small sample sizes,  
 120 because the permutation-of-regressor-residuals test is reportedly robust against small sample  
 121 sizes and correlations among explanatory variables (Potter 2005, Werft and Benner 2010).  
 122 (When an  $\alpha_{\Delta\text{AIC}}$  lower than 0.05 is chosen,  $C_{\Delta\text{AIC}}$  needs adjustment so that any nested model  
 123 of  $\Delta\text{AIC} > C_{\Delta\text{AIC}}$  is rejected by the parametric likelihood ratio test for the significance level  
 124  $\alpha_{\Delta\text{AIC}}$ .) As for condition (iii), its examination is straightforward if the contracted best model in  
 125 (i) has no grouped variable, otherwise it becomes somewhat complicated (see the next

126 subsection for details).

127 Condition (i) examines whether all models with  $\Delta\text{AIC} \leq 2.0$  have the focal explanatory  
128 variable with the same sign for its regression coefficients. If models with  $\Delta\text{AIC} \leq 2.0$  include  
129 all models with  $p \geq 0.05$  (i.e., models not rejected in comparison with the best model), or  
130 equivalently if  $\Delta\text{AIC} > 2.0$  ensures  $p < 0.05$ , then our definition for the statistical  
131 contributiveness has a straightforward connection with the standard concept of statistical  
132 significance. This can be stated as “the focal explanatory variable has the same sign of effect in  
133 all models that may not be rejected by statistical tests in comparison with the best model.”  
134 However,  $\Delta\text{AIC} > 2.0$  ensures  $p < 0.05$  only for models nested in the best model, in the  
135 parametric likelihood-ratio test, as explained above. We can calculate  $p$ -values for non-nested  
136 models by applying the Cox test (Cox 1961), Vuong test (Vuong 1989), or Clarke test (Clarke  
137 2003). In this case, however, the number of models with  $p \geq 0.05$  can be much larger than that  
138 of models with  $\Delta\text{AIC} \leq 2.0$ , which may result in too conservatively judging the statistical  
139 contributiveness of explanatory variables. Using permutation tests instead might give tighter  $p$ -  
140 values, but it slows the analysis considerably. Consequently, for quick extraction of meaningful  
141 information from the data, we adopted  $\Delta\text{AIC} \leq 2.0$  instead of  $p > 0.05$  in condition (i).

142

### 143 *S2.5 Condition (iii) for statistical contributiveness*

144 We explain how to examine condition (iii) when the contracted best model has grouped  
145 variables. We denote the explanatory variables for the contracted best model by  $\mathbf{x}_1, \dots, \mathbf{x}_K$ , and  
146 denote the uncontracted environmental variables by  $\mathbf{z}_1, \dots, \mathbf{z}_L$ . For  $k = 1, \dots, K$ , when  $\mathbf{x}_k$  is a  
147 single variable, then among  $\mathbf{z}_1, \dots, \mathbf{z}_L$  we can find  $\mathbf{z}_{c(k)}$  that is identical to  $\mathbf{x}_k$ , and we include  
148 it in the initial model for the stepwise selection by AIC. When  $\mathbf{x}_k$  is a grouped variable  
149 representing a contraction group having more than two uncontracted environmental variables,  
150 we choose  $\mathbf{z}_{c(k)}$  so that its absolute correlation with  $\mathbf{x}_k$  is the maximum among  $\mathbf{z}_1, \dots, \mathbf{z}_L$ ,  
151 that is,  $c(k) = \operatorname{argmax}_{j \in \{1, \dots, L\}} (|\operatorname{cor}(\mathbf{x}_k, \mathbf{z}_j)|)$ , and we include  $\mathbf{z}_{c(k)}$  in the place of  $\mathbf{x}_k$  in the

152 initial model. When  $\mathbf{x}_k$  is a grouped variable representing a contraction group having exactly  
153 two uncontracted environmental variables, denoted by  $\mathbf{z}_{c1(k)}$  and  $\mathbf{z}_{c2(k)}$ , then both variables  
154 always have the same absolute correlation with  $\mathbf{x}_k$ . Thus, we include both variables for the  
155 initial model in the place of  $\mathbf{x}_k$ .

156 After obtaining the uncontracted best model by the stepwise model selection, we examine  
157 condition (iii) for each of  $\mathbf{x}_k$  for  $k = 1, \dots, K$ , as follows. When  $\mathbf{x}_k$  is a single variable, then  
158 we judge that condition (iii) is met if  $\mathbf{z}_{c(k)} = \mathbf{x}_k$  is included in the uncontracted best model,  
159 and if the regression coefficient  $\gamma_{c(k)}$  for  $\mathbf{z}_{c(k)}$  in the uncontracted best model shares the same  
160 sign with the regression coefficient  $\beta_k$  for  $\mathbf{x}_k$  in the contracted best model, that is,  $\gamma_{c(k)}\beta_k >$   
161 0.

162 When  $\mathbf{x}_k$  is a grouped variable representing a contraction group having more than two  
163 uncontracted environmental variables, then we judge that condition (iii) is met if  $\mathbf{z}_{c(k)}$  is  
164 included in the uncontracted best model, and if its regression coefficient  $\gamma_{c(k)}$  multiplied by  
165  $\text{cor}(\mathbf{z}_{c(k)}, \mathbf{x}_k)$  shares the same sign with the regression coefficient  $\beta_k$  for  $\mathbf{x}_k$  in the contracted  
166 best model, that is,  $\gamma_{c(k)}\text{cor}(\mathbf{z}_{c(k)}, \mathbf{x}_k)\beta_k > 0$ .

167 When  $\mathbf{x}_k$  is a grouped variable representing a contraction group having exactly two  
168 uncontracted environmental variables  $\mathbf{z}_{c1(k)}$  and  $\mathbf{z}_{c2(k)}$ , then we judge that condition (iii) is  
169 met if (a)  $\mathbf{z}_{c1(k)}$  and  $\mathbf{z}_{c2(k)}$  are both included and  $\gamma_{c1(k)}\text{cor}(\mathbf{z}_{c1(k)}, \mathbf{x}_k)\beta_k > 0$  and  
170  $\gamma_{c2(k)}\text{cor}(\mathbf{z}_{c2(k)}, \mathbf{x}_k)\beta_k > 0$  are both satisfied, or if (b) only  $\mathbf{z}_{c1(k)}$  is included and  
171  $\gamma_{c1(k)}\text{cor}(\mathbf{z}_{c1(k)}, \mathbf{x}_k)\beta_k > 0$  is satisfied, or if (c) only  $\mathbf{z}_{c2(k)}$  is included and  
172  $\gamma_{c2(k)}\text{cor}(\mathbf{z}_{c2(k)}, \mathbf{x}_k)\beta_k > 0$  is satisfied.

173

## 174 *S2.6 Interaction among statistically contributive explanatory variables*

175 When a focal animal category had more than one statistically contributive explanatory variable  
176 in the analysis for main effects (described in “Statistical inference” in the main text), we further

177 analyzed interactions among them. First, for each possible combination of the contributive  
178 variables, we calculated the product of the two variables' intensities at each pond and added it to  
179 the set of contracted environmental variables and to the set of uncontracted environmental  
180 variables. Second, we conducted the analysis described in the sections "Model selection" and  
181 "Statistical inference" in the main text. Note that the set of models examined in this analysis for  
182 interactions includes the set of models in the analysis for main effects. Thus, AICs of the  
183 contracted best models in this analysis for interactions are always no higher than those of the  
184 corresponding contracted best models in the analysis for main effects. Therefore, the contracted  
185 best models with interactions are all as good as the corresponding contracted best models  
186 without interactions.

187

### 188 *S2.7 Best models*

189 The best models for explaining the taxonomic richness of animal groups shown in Figs 2 and 3  
190 in the main text are listed below. All of the best models were not Poisson regression mixed  
191 models but normal Poisson regression models (i.e.,  $\sigma = 0$ , which gives  $r_i = 0$  for all  $i$  in Eq.  
192 (2) in the main text). Each  $n_{\text{model}}$  indicates the number of models satisfying  $\Delta\text{AIC} \leq 2.0$ .  
193 "XXX" between two variable names means the interaction of those variables. Statistically  
194 contributive stressors in contracted best models are indicated with "\*" (contributive and  
195 significant) or "%" (contributive but non-significant).

196

#### 197 **All-sampled**

198 Contracted best model ( $r^2 = 0.64$ ,  $n_{\text{model}} = 6$ ):

$$199 \text{E}(\ln(y)) = 4.71 - 0.32[\text{Cont.var1.1}] - 0.27[\text{Cont.var1.3}] - 0.49[\text{I.BPMC}] - 0.61[\%shallowness] \\ 200 - 0.54[*\text{F-plant noncoverage}] - 0.38[\text{concrete bank}]$$

201 Uncontracted best model ( $r^2 = 0.66$ ):

$$202 \text{E}(\ln(y)) = 4.15 + 0.31[\text{I.thiamethoxam}] + 0.32[\text{H.butachlor}] - 0.44[\text{I.BPMC}] -$$



203 0.56[shallowness] – 0.47[F-plant noncoverage] – 0.40[concrete bank]

204

205 **Large animal**

206 Contracted best model ( $r^2 = 0.69$ ,  $n_{\text{model}} = 32$ )

207  $E(\ln(y)) = 4.07 - 0.68[\text{Cont.var1.2}] + 0.70[\text{F.IBP...ignition loss}] - 1.28[*\text{shallowness}] - 0.67[*\text{F-}$   
208  $\text{plant noncoverage}]$

209 Uncontracted best model ( $r^2 = 0.83$ )

210  $E(\ln(y)) = 4.27 - 0.70[\text{E-plant noncoverage}] + 0.74[\text{ignition loss}] - 1.44[\text{shallowness}] -$   
211  $0.62[\text{F-plant noncoverage}] + 0.89[\text{F.furametypr}] - 0.38[\text{F.metominostrobin Z}]$

212

213 **Small animal**

214 Contracted best model ( $r^2 = 0.59$ ,  $n_{\text{model}} = 18$ )

215  $E(\ln(y)) = 3.71 - 0.37[\text{Cont.var1.1}] - 0.52[*\text{I.BPMC}] - 0.52[*\text{F-plant noncoverage}] -$   
216  $0.83[*\text{concrete bank}]$

217 Uncontracted best model ( $r^2 = 0.75$ )

218  $E(\ln(y)) = 3.18 - 0.39[\text{I.BPMC}] - 0.40[\text{F-plant noncoverage}] - 1.03[\text{concrete bank}] +$   
219  $0.62[\text{F.fthalide}] + 0.60[\text{area}]$

220

221 **Small animal (with interaction)**

222 Contracted best model ( $r^2 = 0.77$ ,  $n_{\text{model}} = 27$ )

223  $E(\ln(y)) = 3.87 - 0.61[\text{Cont.var1.1}] - 0.33[\text{bullfrog}] - 0.45[*\text{F-plant noncoverage}] -$   
224  $1.31[*\text{I.BPMC XXX concrete bank}] - 0.72[\text{F-plant noncoverage XXX concrete bank}]$

225 Uncontracted best model ( $r^2 = 0.82$ )

226  $E(\ln(y)) = 2.91 - 0.22[\text{bullfrog}] - 1.01[\text{I.BPMC XXX concrete bank}] - 0.80[\text{F-plant}$   
227  $\text{noncoverage XXX concrete bank}] + 0.48[\text{H.pentoxazone}] + 0.35[\text{area}]$

228 **Vertebrate**

229 Contracted best model ( $r^2 = 0.23$ ,  $n_{\text{model}} = 17$ ):

230  $E(\ln(y)) = 1.66 - 0.76[\text{F.Probenazole}]$

231 Uncontracted best model ( $r^2 = 0.43$ ):

232  $E(\ln(y)) = 1.70 - 0.58[\text{F.Probenazole}] - 0.58[\text{Black\_bass}]$

233

### 234 **Invertebrate**

235 Contracted best model ( $r^2 = 0.72$ ,  $n_{\text{model}} = 4$ ):

236  $E(\ln(y)) = 4.85 - 0.37[\text{Cont.var1.1}] - 0.39[\text{Cont.var1.3}] - 0.71[*\text{I.BPMC}] - 0.65[\text{shallowness}] -$

237  $0.67[*\text{F-plant noncoverage}] - 0.58[\% \text{concrete bank}]$

238 Uncontracted best model ( $r^2 = 0.75$ ):

239  $E(\ln(y)) = 4.14 + 0.36[\text{I.thiamethoxam}] + 0.46[\text{H.butachlor}] - 0.65[\text{I.BPMC}] -$

240  $0.58[\text{shallowness}] - 0.60[\text{F-plant noncoverage}] - 0.64[\text{concrete bank}]$

241

### 242 **Invertebrate (with interaction)**

243 Contracted best model ( $r^2 = 0.74$ ,  $n_{\text{model}} = 4$ ):

244  $E(\ln(y)) = 4.76 - 0.63[\text{Cont.var1.1}] - 0.30[\text{bullfrog}] - 0.59[\text{shallowness}] - 0.59[\text{F-plant}$

245  $\text{noncoverage}] - 1.25[*\text{I.BPMC XXX concrete bank}] - 0.63[\% \text{F-plant noncoverage XXX}$

246  $\text{concrete bank}]$

247 Uncontracted best model ( $r^2 = 0.75$ ):

248  $E(\ln(y)) = 4.12 + 0.58[\text{I.thiamethoxam}] - 0.32[\text{bullfrog}] - 0.54[\text{shallowness}] - 0.58[\text{F-plant}$

249  $\text{noncoverage}] - 1.19[\text{I.BPMC XXX concrete bank}] - 0.38[\text{F-plant noncoverage XXX concrete}$

250  $\text{bank}]$

251

### 252 **Fish**

253 Contracted best model ( $r^2 = 0.23$ ,  $n_{\text{model}} = 15$ ):

254  $E(\ln(y)) = 1.35 - 1.03[*\text{F.probenazole}]$

255 Uncontracted best model ( $r^2 = 0.68$ ):

256  $E(\ln(y)) = 1.37 - 0.87[\text{F.probenazole}] - 4.67[\text{black bass}] + 4.87[\text{I.tebufenozide}] +$   
257  $4.40[\text{F.fthalide}] - 1.42[\text{F.isoprothiolane}]$

258

259 **Large insect**

260 Contracted best model ( $r^2 = 0.86$ ,  $n_{\text{model}} = 7$ ):

261  $E(\ln(y)) = 4.61 - 1.11[\text{bluegill}] - 0.96[\text{Cont.var1.3}] - 0.68[\text{crayfish}] - 2.12[\text{I.BPMC}] - 1.73[\text{F-}$   
262  $\text{plant noncoverage}] - 0.83[\text{concrete bank}]$

263 Uncontracted best model ( $r^2 = 0.85$ ):

264  $E(\ln(y)) = 3.93 - 0.97[*\text{bluegill}] + 0.93[\text{H.butachlor}] - 0.70[\text{crayfish}] - 2.14[*\text{I.BPMC}] -$   
265  $1.78[*\text{F-plant noncoverage}] - 1.02[\text{concrete bank}]$

266

267 **Large insect (with interaction)**

268 Contracted best model ( $r^2 = 0.88$ ,  $n_{\text{model}} = 4$ ):

269  $E(\ln(y)) = 5.85 - 0.79[\text{Cont.var1.1}] - 1.73[\text{Cont.var1.3}] - 0.78[\text{crayfish}] - 1.53[\%\text{shallowness}]$   
270  $- 1.76[*\text{F-plant noncoverage}] - 2.58[*\text{bluegill XXX I.BPMC}]$

271 Uncontracted best model ( $r^2 = 0.92$ ):

272  $E(\ln(y)) = 6.00 + 1.76[\text{H.butachlor}] - 0.83[\text{crayfish}] - 1.56[\text{shallowness}] - 2.18[\text{F-plant}$   
273  $\text{noncoverage}] - 2.24[\text{bluegill XXX I.BPMC}] - 1.97[\text{E-plant noncoverage}]$

274

275 **Small insect**

276 Contracted best model ( $r^2 = 0.58$ ,  $n_{\text{model}} = 39$ ):

277  $E(\ln(y)) = 2.63 + 0.41[\text{F.probenazole}] - 0.43[\text{F-plant noncoverage}] - 0.74[\text{concrete bank}]$

278 Uncontracted best model ( $r^2 = 0.77$ ):

279  $E(\ln(y)) = 2.57 - 1.03[*\text{concrete bank}] - 0.95[\text{TN}] + 0.93[\text{area}] - 0.48[\text{F.isoprothiolane}]$

280

281 *S2.8 Impacts of statistically contributive explanatory variables*

282 When the contracted best model had  $K$  explanatory variables, of which  $J$  variables had

283 statistically contributive effects, we calculated their impacts on the response variable  
 284 (taxonomic richness of the focal animal category) as follows. We permuted the explanatory  
 285 variables so that the statistically contributive variables come first, which allowed rewriting of  
 286 Eq. (2) in the main text as

$$287 \quad \ln(Y_i) = \alpha + \sum_{j=1}^J \beta_j x_{j,i} + \sum_{k=J+1}^K \beta_k x_{k,i} + r_i. \quad (\text{S2.9})$$

288 We assumed a hypothetical 0th pond with all contributive variables having zero intensities and  
 289 all non-contributive variables having the average intensities among the studied ponds (i.e.,  
 290  $x_{j,0} = 0$  for all  $j = 1, \dots, J$ , and  $x_{k,0} = \bar{x}_k = \frac{1}{M} \sum_{i=1}^M x_{k,i}$  for all  $k = J + 1, \dots, K$ ). We call this  
 291 hypothetical pond the normal pond. From Eq. (S2.9), the expected taxonomic richness of the  
 292 normal pond is given by

$$293 \quad R = \exp\left(\alpha + \sum_{k=J+1}^K \beta_k \bar{x}_k\right), \quad (\text{S2.10})$$

294 where  $R = Y_0$  holds for the normal Poisson regression ( $r_i = 0$ ). At the normal pond, if we  
 295 increase the intensity of the  $j$ th explanatory variable,  $x_{j,0}$ , from its minimum value 0 to its  
 296 average  $\bar{x}_j$  among the studied ponds, then the expected taxonomic richness is given by  
 297  $R_j^{\text{mean}} = R \exp(\beta_j \bar{x}_j)$ . The change rate of the taxonomic richness is calculated as  $R_j^{\text{mean}}/R =$   
 298  $\exp(\beta_j \bar{x}_j)$ . On this basis, we calculated the mean impact of the  $j$ th explanatory variable as the  
 299 strength of the change rate,

$$300 \quad I_j^{\text{mean}} = \begin{cases} \frac{R_j^{\text{mean}}}{R} = \exp(\beta_j \bar{x}_j) & \text{for } \beta_j > 0 \\ \frac{R}{R_j^{\text{mean}}} = \exp(-\beta_j \bar{x}_j) & \text{for } \beta_j < 0. \end{cases} \quad (\text{S2.11})$$

301 Note that  $I_j^{\text{mean}}$  for positive  $\beta_j$  indicates the strength of the increasing rate, whereas  $I_j^{\text{mean}}$   
 302 for negative  $\beta_j$  gives the strength of the diminishing rate.

303 Analogously, if we increase the intensity of the  $j$ th explanatory variable from its minimum  
 304 value 0 to its maximum 1 at the normal pond, then the expected taxonomic richness is given by

305  $R_j^{\max} = R \exp(\beta_j)$ . On this basis, we calculated the maximum impact of the  $j$ th explanatory  
 306 variable as follows:

$$307 \quad I_j^{\max} = \begin{cases} \frac{R_j^{\max}}{R} = \exp(\beta_j) & \text{for } \beta_j > 0 \\ \frac{R}{R_j^{\max}} = \exp(-\beta_j) & \text{for } \beta_j < 0. \end{cases} \quad (\text{S2.12})$$

308 When all statistically contributive variables in the contracted best model had negative  
 309 effects (i.e.,  $\beta_j < 0$  for all  $j = 1, \dots, J$ ), then by changing their intensities at the normal pond  
 310 so that  $x_{j,0} = x_{j,i}$  holds for all  $j = 1, \dots, J$ , we calculated their combined negative impact at the  
 311  $i$ th pond as the strength of diminishing rate,

$$312 \quad I_{\{1, \dots, J\}}^i = \frac{R}{R \exp\left(\sum_{j=1}^J \beta_j x_{j,i}\right)} = \exp\left(-\sum_{j=1}^J \beta_j x_{j,i}\right). \quad (\text{S2.13})$$

313 From this equation, we calculated the mean combined impact as a geometric mean among  
 314  $I_{\{1, \dots, J\}}^i$  for  $j = 1, \dots, J$ , as

$$315 \quad I_{\{1, \dots, J\}}^{\text{mean}} = \left[\prod_{i=1}^M I_{\{1, \dots, J\}}^i\right]^{\frac{1}{M}} = \exp\left(-\sum_{j=1}^J \beta_j \bar{x}_j\right), \quad (\text{S2.14})$$

316 which corresponds to the combined impact on the average pond. In addition, we calculated the  
 317 maximum combined impact as the maximum among  $I_{\{1, \dots, J\}}^i$  for  $j = 1, \dots, J$  as

$$318 \quad I_{\{1, \dots, J\}}^{\max} = \max\{I_{\{1, \dots, J\}}^1, \dots, I_{\{1, \dots, J\}}^M\}. \quad (\text{S2.15})$$

319 When some of statistically contributive variables had positive effects, those variables were  
 320 omitted. In this study, we also omitted statistically contributive explanatory variables that did  
 321 not have statistically significant effects. (As for the combined impact of positive effects, its  
 322 mean and maximum can be calculated with Eqs. (S2.13–S2.15) by removing the minus symbol  
 323 on the right-hand sides of Eqs. (S2.13) and (S2.14) and omitting variables with negative effects  
 324 instead, although such a calculation was not conducted in this study.)

### 325 *S2.9 Discussion on our statistical method*

326 In multivariate regression analysis, too many explanatory variables can lead to a

327 multicollinearity problem as well as extremely heavy calculation for model selection  
328 procedures. However, removing and/or aggregating some of those variables based on relevant  
329 previous studies may cause difficulty in detection of unknown relationships between the  
330 response and explanatory variables. To handle this difficulty, we developed a new statistical  
331 procedure for multivariate regression analysis by combining the contraction of explanatory  
332 variables (by using only correlations among them), best-subset model selection, stepwise model  
333 selection, and permutation tests. This procedure enabled us to detect previously unknown and  
334 significantly negative effects of two pesticides, probenazole (fungicide) and BPMC  
335 (insecticide), on taxonomic richness of the sampled animals and to evaluate the combined  
336 impacts of BPMC and other environmental stressors. In principle, our procedure is applicable to  
337 data with not only univariate response variables but also multivariate ones, as long as the  
338 models' AICs (or other suitable criteria) can be calculated.

339 In this study, the most statistically contributive stressors, those satisfying conditions (i–iii)  
340 defined in the “Statistical inference” section in the main text, were also statistically significant  
341 in the permutation test that explicitly repeats the model selection process. Thus, first finding  
342 statistically contributive explanatory variables and then examining their statistical significance  
343 may be an efficient strategy, because the permutation test that repeats model selection requires  
344 heavy calculation. Further examination and improvement of our procedure, and clarification of  
345 its relationships with other approaches for post-model-selection inference (Leeb et al. 2015;  
346 Taylor and Tibshirani 2015, 2018; Lee and Wu 2018), may provide more efficient and robust  
347 tools for such inference.

348  
349

## 350 **References**

351

352 Akaike H. Information theory and an extension of the maximum likelihood principle. In: Petrov  
353 BN, Caski F, editors. Proceedings of the 2nd International Symposium on Information  
354 Theory. Budapest: Akadimiai Kiado; 1973. pp. 267-281.

355 Broström G, Holmberg H. Generalized linear models with clustered data: Fixed and random  
356 effects models. *Computational Statistics & Data Analysis* 2011;55: 3123-3134.

357 Clarke KA. Nonparametric model discrimination in international relations. *Journal of Conflict*  
358 *Resolution* 2003;47:72–93.

359 Cox DR. Tests of separate families of hypotheses. *Proceedings of the Fourth Berkeley*  
360 *Symposium on Mathematical Statistic and Probability* 1961;1:105–123.

361 Kitagawa M, Sakamoto Y, Ishiguro M, Kitagawa G. *Entropy statistics (in Japanese)*. Tokyo:  
362 Kyoritsu Press; 1983.

363 Lee SMS, Wu Y. A bootstrap recipe for post-model-selection inference under linear regression  
364 models. *Biometrika* 2018;105: 873-890. <https://doi.org/10.1093/biomet/asy046>.

365 Leeb H, Pötscher BM, Ewald K. On various confidence intervals post-model-selection.  
366 *Statistical Science* 2015;30: 216-227.

367 Murtaugh PA. In defense of P values. *Ecology* 2014;95:611–617. doi:10.1890/13-0590.1.

368 Taylor J, Tibshirani RJ. Statistical learning and selective inference. *Proceedings of the National*  
369 *Academy of Sciences USA* 2015;112(25): 7629-7634. doi:  
370 <http://www.pnas.org/content/112/25>.

371 Taylor J, Tibshirani R. Post-selection inference for  $l_1$  penalized likelihood models. *The Canadian*  
372 *Journal of Statistics* 2018;46: 41-61.

373 Vuong QH. Likelihood ratio tests for model selection and non-nested hypotheses. *Econometrica*  
374 1989;57(2):307–333.

375 Werft W, Benner A. glmperm: a permutation of regressor residuals test for inference in  
376 generalized linear models. *R Journal* 2010;2(1): 39-43.

377

378
