# Supplementary material for: Combined impact of pesticides and other environmental stressors on animal diversity in irrigation ponds
Source: PLoS One. 2020 Jul 2;15(7):e0229052. doi: 10.1371/journal.pone.0229052 (PMC7332035; doi:10.1371/journal.pone.0229052)
Supplement: S7 Table — (XLSX) [file pone.0229052.s014.xlsx]

## Sheet: S7 Table Number of animals
Pond ID	Pond name	Pond ID	Reptile	Fish	Mollusk	Crustacean	Large insect	Small insect	Annelid	Total
1	Kashi-tani-roku-gou-ike	1	1	5	5	3	23	14	8	59
2	Sara-ike-A	2	1	2	6	1	9	11	10	40
3	Oku-no-ike	3	2	5	1	2	5	9	11	35
4	Minami-shin-ike	4	1	4	4	2	4	13	5	33
5	Ro-kken-ya-ike	5	1	3	0	0	7	10	12	33
6	Naka-ike	6	2	0	3	1	5	14	7	32
7	Oka-shiro-ike	7	0	4	1	2	10	11	4	32
8	Nishi-tani-ike	8	0	4	3	3	3	10	9	32
9	Oh-ike-B	9	1	2	1	1	4	9	13	31
10	Yama-tani-ike	10	1	1	2	1	3	11	8	27
11	Mura-ike	11	2	4	1	2	2	12	3	26
12	Higashi-shin-ike	12	1	2	0	1	1	16	4	25
13	Tani-ga-ike	13	2	4	1	4	1	5	8	25
14	Shimo-ike	14	1	3	0	1	7	8	4	24
15	Shin-ike	15	3	4	0	3	4	6	3	23
16	Shimo-kawa-ike	16	2	5	0	2	1	7	6	23
17	Shiro-no-ike	17	2	3	0	2	3	7	3	20
18	To-ji-ga-ike	18	1	4	0	2	0	6	7	20
19	Naka-no-ike-higashi	19	1	4	1	2	0	5	5	18
20	Ama-ike	20	1	0	1	1	0	10	3	16
21	Hira-ike	21	2	1	0	0	2	1	3	9
